# Supplementary material for: Probing the nanoscale driving forces for adsorbate-induced Rh50Pd50 nanoparticle reconstruction via mean-field models of multi-faceted nanoparticles
Source: Royal Society of Chemistry journal article supplement (doi:10.1039/d3cy01197f), 2023-12-11
Supplement: d3cy01197f1.pdf [file d3cy01197f1.pdf]

## Supplementary Information

### **Probing the Nanoscale Driving Forces for Adsorbate-Induced Rh<sub>50</sub>Pd<sub>50</sub> Nanoparticle Reconstruction via Mean-Field Models of Multi-Faceted Nanoparticles**

Shuqiao Wang<sup>1</sup> and Alyssa J.R. Hensley<sup>1\*</sup>

<sup>1</sup> Department of Chemical Engineering and Materials Science, Stevens Institute of Technology,  
Hoboken, NJ 07030

\* Corresponding Author: [ahensley@stevens.edu](mailto:ahensley@stevens.edu)

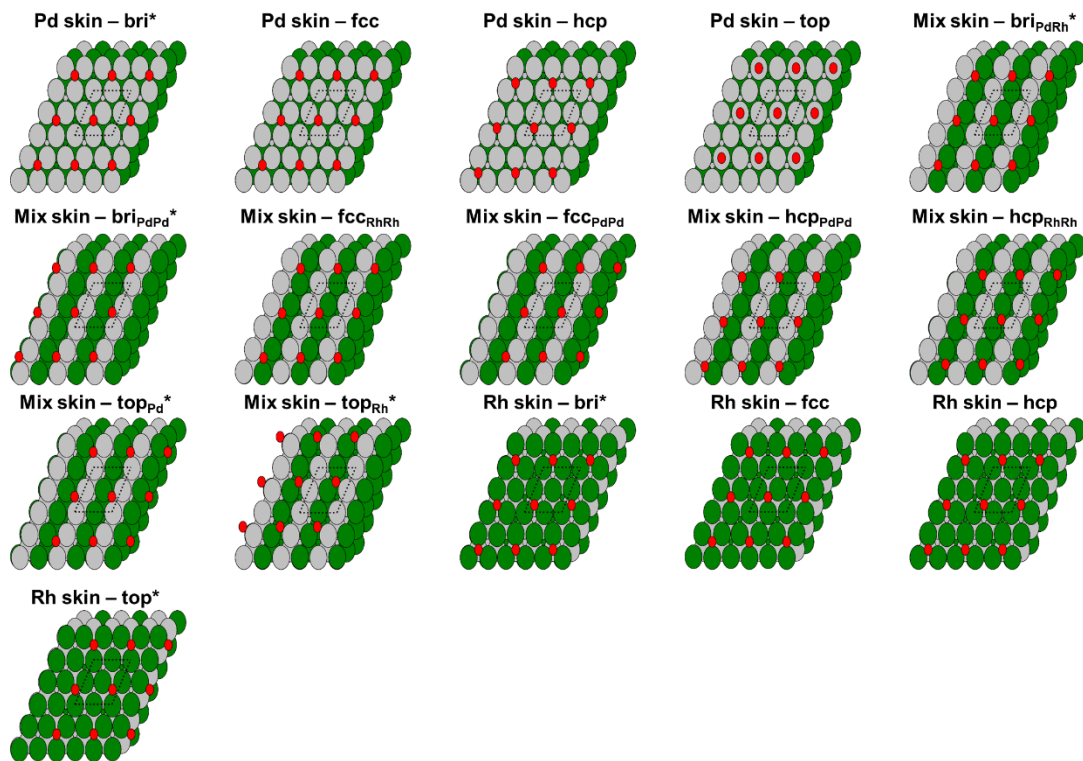

**Figure S1.** Top views of sites tested for 0.25 ML O\* adsorption on Rh<sub>50</sub>Pd<sub>50</sub>(111). The silver, green, and red spheres represent Pd, Rh, and O, respectively. The sites marked with a \* indicate site shifting upon optimization. See Table S1 for adsorption energies.

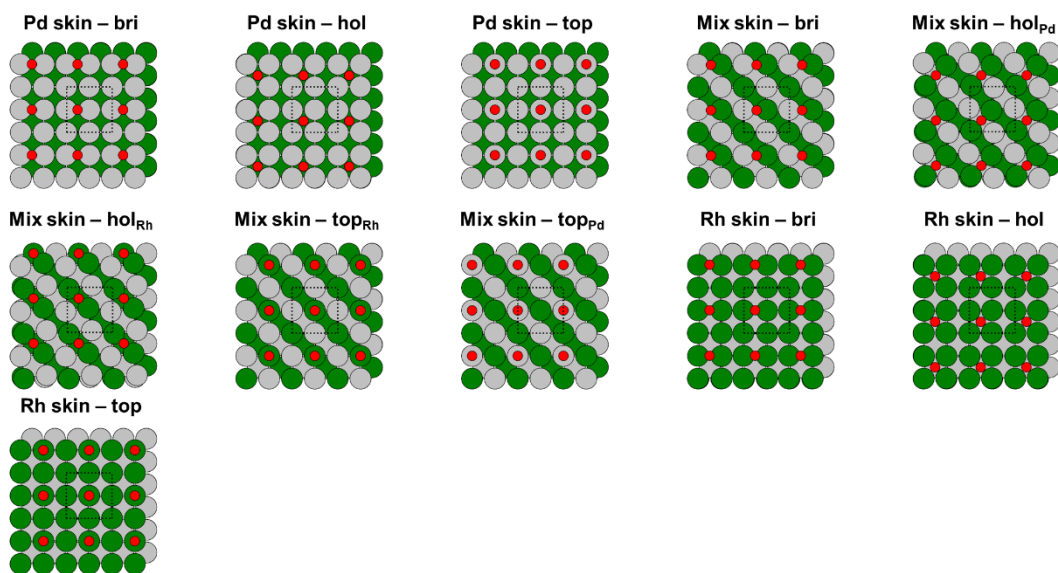

**Figure S2.** Top views of sites tested for 0.25 ML O\* adsorption on Rh<sub>50</sub>Pd<sub>50</sub>(100). The silver, green, and red spheres represent Pd, Rh, and O, respectively. See Table S2 for adsorption energies.

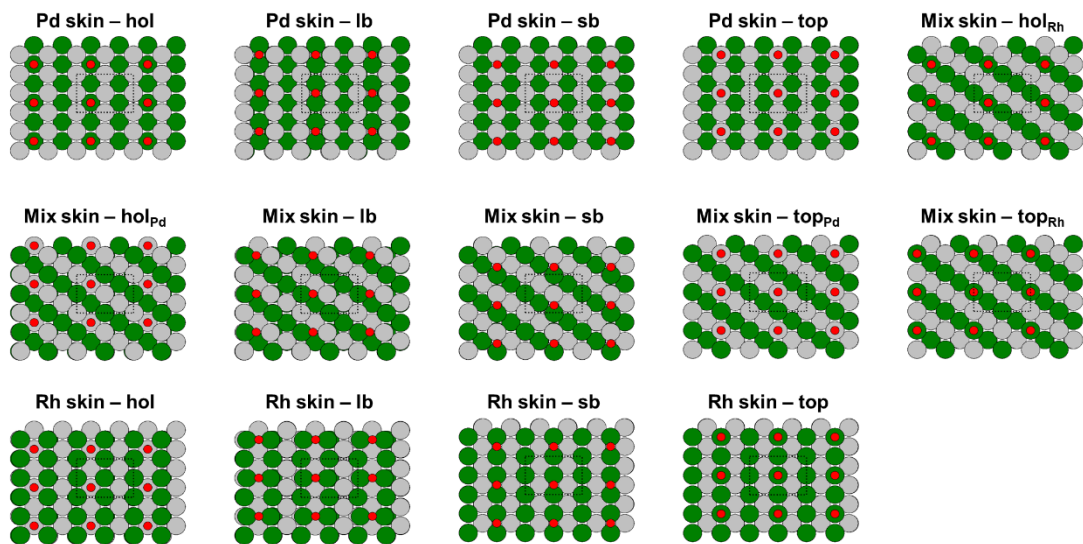

**Figure S3.** Top views of sites tested for 0.25 ML O\* adsorption on Rh<sub>50</sub>Pd<sub>50</sub>(110). The silver, green, and red spheres represent Pd, Rh, and O, respectively. See Table S3 for adsorption energies.

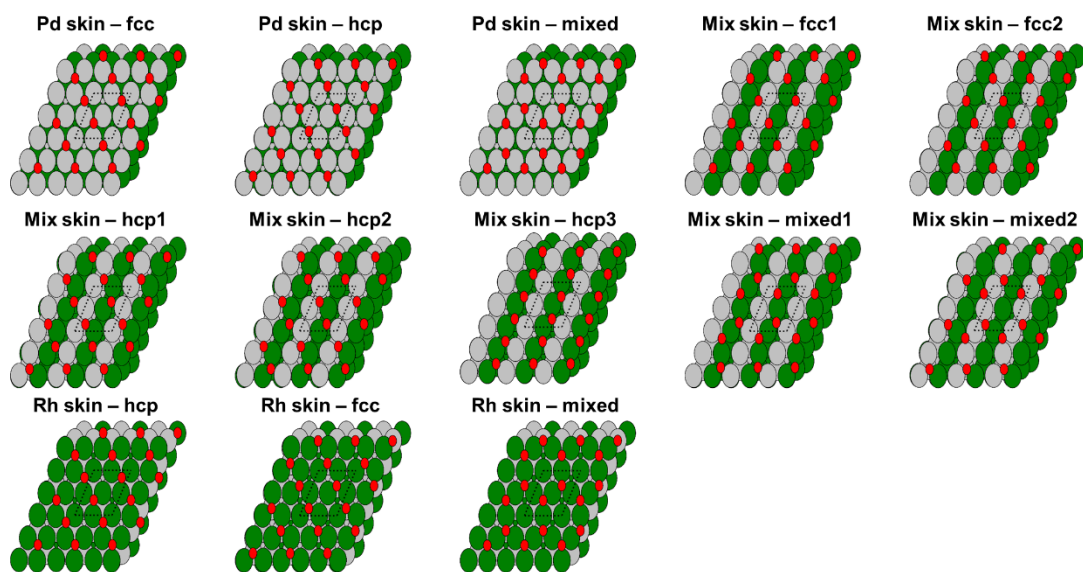

**Figure S4.** Top views of sites tested for 0.50 ML O\* adsorption on Rh<sub>50</sub>Pd<sub>50</sub>(111). The silver, green, and red spheres represent Pd, Rh, and O, respectively. See Table S1 for adsorption energies.

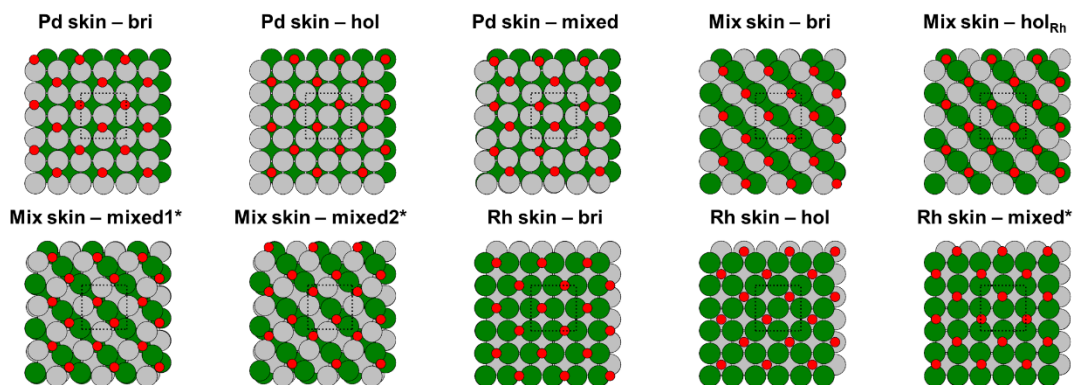

**Figure S5.** Top views of sites tested for 0.50 ML O\* adsorption on Rh<sub>50</sub>Pd<sub>50</sub>(100). The silver, green, and red spheres represent Pd, Rh, and O, respectively. The sites marked with a \* indicate site shifting upon optimization. See Table S2 for adsorption energies.

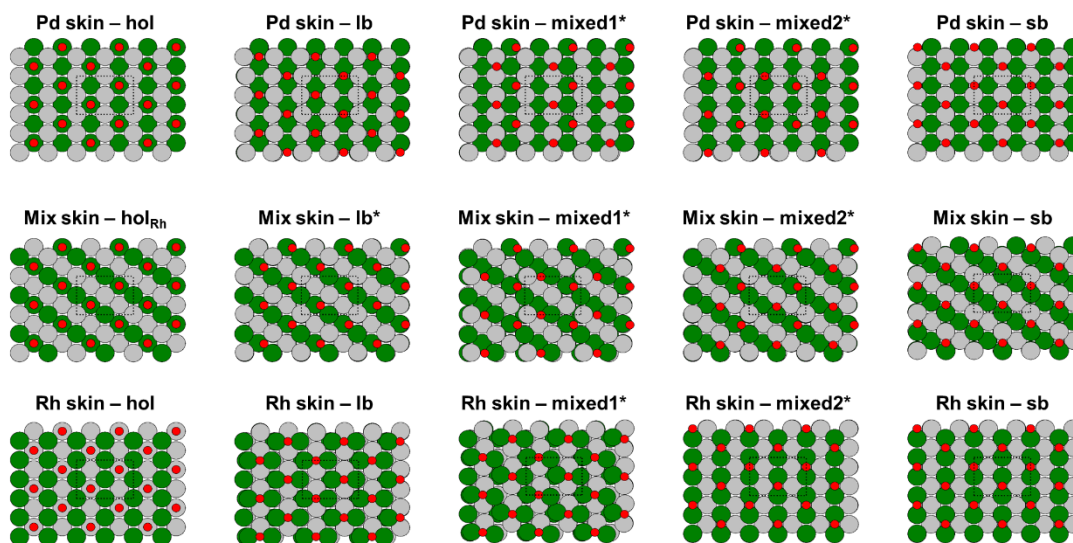

**Figure S6.** Top views of sites tested for 0.50 ML O\* adsorption on Rh<sub>50</sub>Pd<sub>50</sub>(110). The silver, green, and red spheres represent Pd, Rh, and O, respectively. The sites marked with a \* indicate site shifting upon optimization. See Table S3 for adsorption energies.

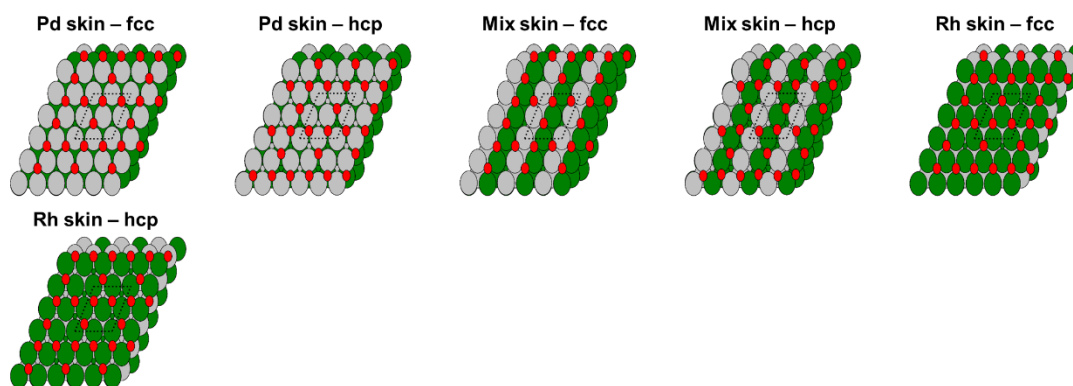

**Figure S7.** Top views of sites tested for 0.75 ML O\* adsorption on Rh<sub>50</sub>Pd<sub>50</sub>(111). The silver, green, and red spheres represent Pd, Rh, and O, respectively. See Table S1 for adsorption energies.



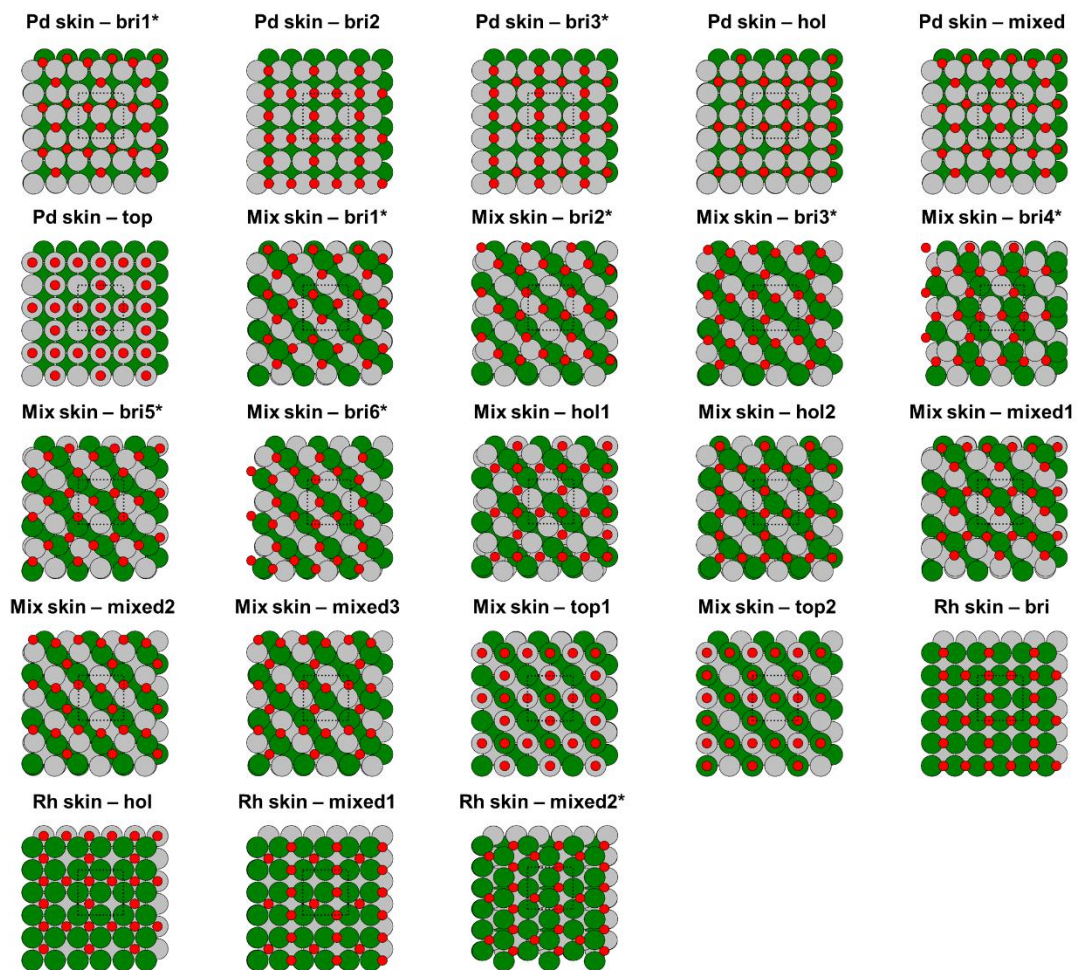

**Figure S8.** Top views of sites tested for 0.75 ML O\* adsorption on Rh<sub>50</sub>Pd<sub>50</sub>(100). The silver, green, and red spheres represent Pd, Rh, and O, respectively. The sites marked with a \* indicate site shifting upon optimization. See Table S2 for adsorption energies.

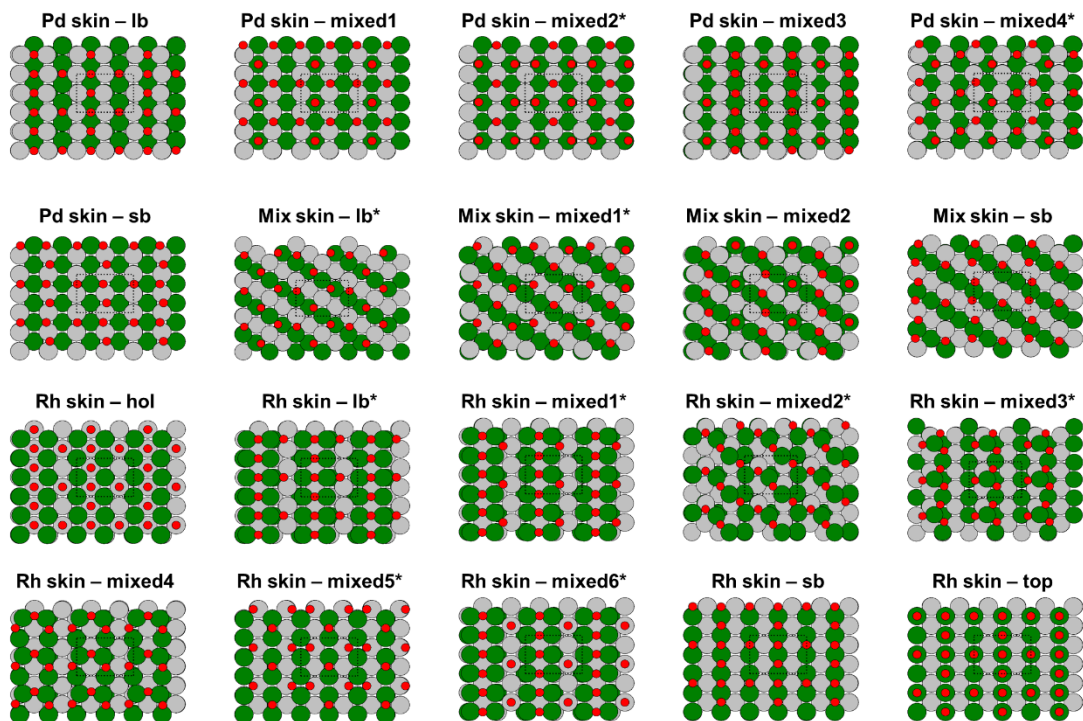

**Figure S9.** Top views of sites tested for 0.75 ML O\* adsorption on Rh<sub>50</sub>Pd<sub>50</sub>(110). The silver, green, and red spheres represent Pd, Rh, and O, respectively. The sites marked with a \* indicate site shifting upon optimization. See Table S3 for adsorption energies.

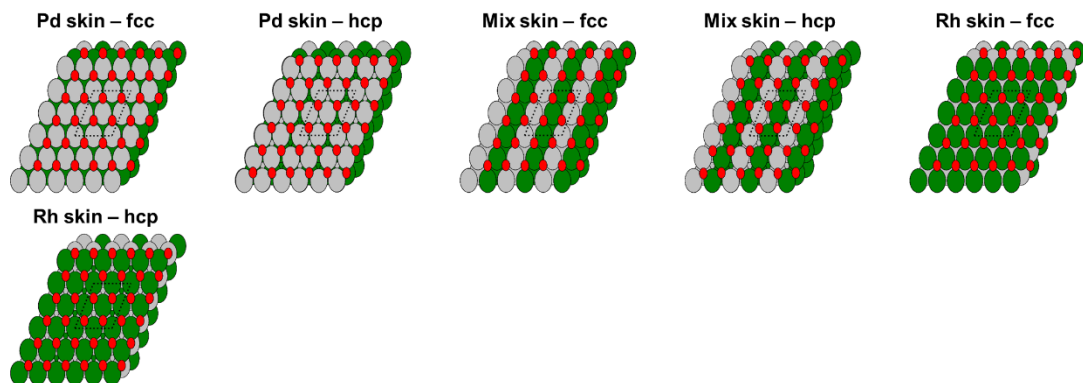

**Figure S10.** Top views of sites tested for 1.00 ML O\* adsorption on Rh<sub>50</sub>Pd<sub>50</sub>(111). The silver, green, and red spheres represent Pd, Rh, and O, respectively. See Table S1 for adsorption energies.

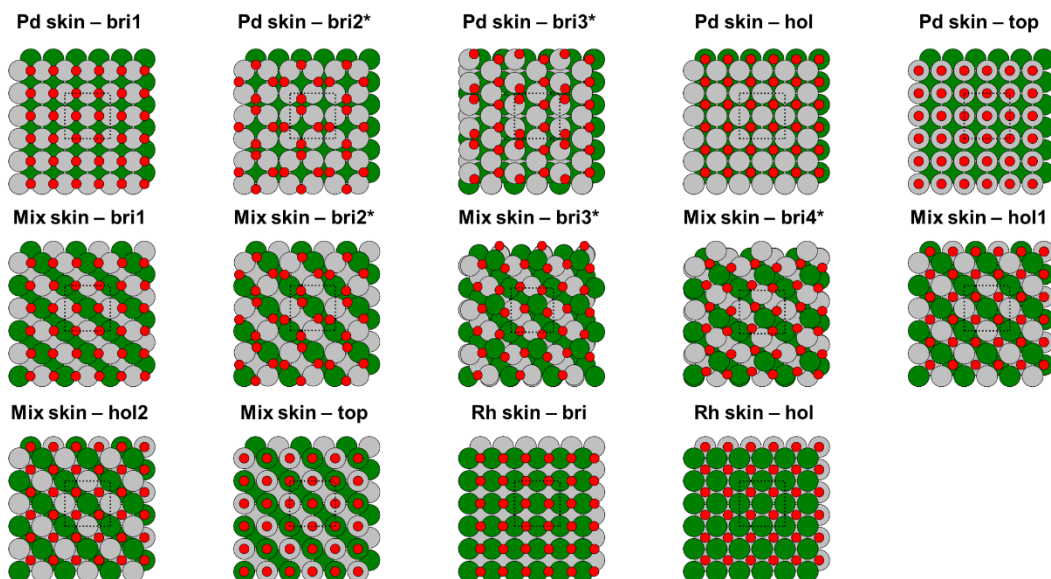

**Figure S11.** Top views of sites tested for 1.00 ML  $O^*$  adsorption on  $Rh_{50}Pd_{50}(100)$ . The silver, green, and red spheres represent Pd, Rh, and O, respectively. The sites marked with a \* indicate site shifting upon optimization. See Table S2 for adsorption energies.

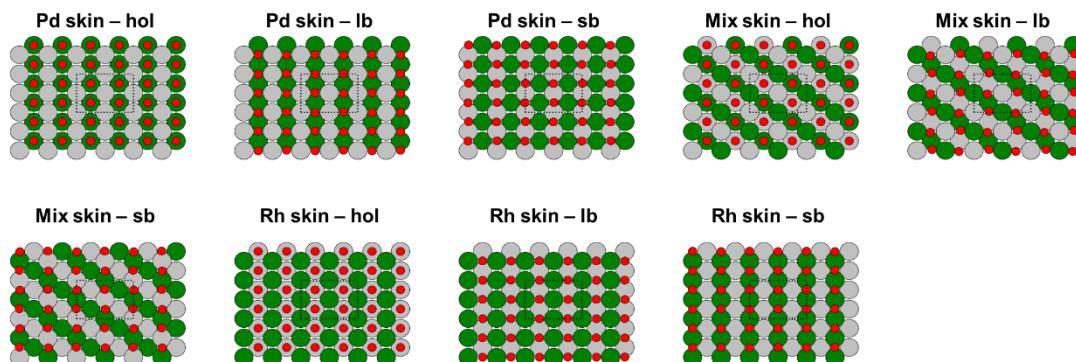

**Figure S12.** Top views of sites tested for 1.00 ML  $O^*$  adsorption on  $Rh_{50}Pd_{50}(110)$ . The silver, green, and red spheres represent Pd, Rh, and O, respectively. See Table S3 for adsorption energies.

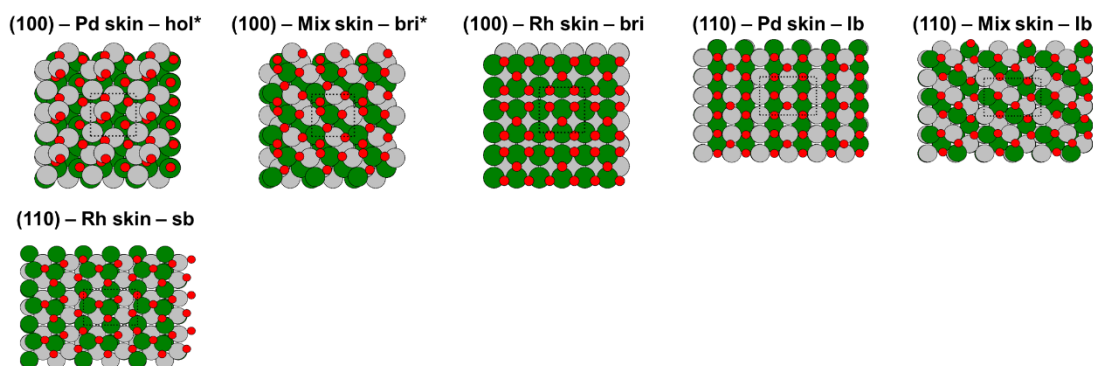

**Figure S13.** Top views of sites tested for 1.25 ML  $O^*$  adsorption on  $Rh_{50}Pd_{50}(100)$  and (110). The sites marked with a \* indicate site shifting upon optimization. The silver, green, and red spheres represent Pd, Rh, and O, respectively. See Tables S2-S3 for adsorption energies.

**Table S1.** Coverage-dependent adsorption and formation energies for O\* on Rh<sub>50</sub>Pd<sub>50</sub>(111). Dominant adsorption configurations at each coverage are indicated in bold.

| O* Coverage (ML) | Pd skin    |                                 |                             | Mix skin                  |                                 |                             | Rh skin    |                                 |                             |
|------------------|------------|---------------------------------|-----------------------------|---------------------------|---------------------------------|-----------------------------|------------|---------------------------------|-----------------------------|
|                  | Site Type  | E <sub>adsorption</sub> (eV/O*) | E <sub>formation</sub> (eV) | Site Type                 | E <sub>adsorption</sub> (eV/O*) | E <sub>formation</sub> (eV) | Site Type  | E <sub>adsorption</sub> (eV/O*) | E <sub>formation</sub> (eV) |
| 0.00             | -          | -                               | <b>5.63</b>                 | -                         | -                               | <b>6.44</b>                 | -          | -                               | <b>7.47</b>                 |
| 0.25             | bri*       | -0.97                           | -                           | bri <sub>PdRh</sub> *     | -1.83                           | -                           | bri        | -2.25                           | -                           |
|                  | <b>fcc</b> | <b>-0.97</b>                    | <b>4.66</b>                 | bri <sub>PdPd</sub> *     | -1.38                           | -                           | fcc        | -2.20                           | -                           |
|                  | hcp        | -0.79                           | -                           | <b>fcc<sub>RhRh</sub></b> | <b>-1.83</b>                    | <b>4.61</b>                 | <b>hcp</b> | <b>-2.25</b>                    | <b>5.23</b>                 |
|                  | top        | 0.43                            | -                           | fcc <sub>PdPd</sub>       | -1.38                           | -                           | top*       | -2.28                           | -                           |
|                  | -          | -                               | -                           | hcp <sub>PdPd</sub>       | -1.40                           | -                           | -          | -                               | -                           |
|                  | -          | -                               | -                           | hcp <sub>RhRh</sub>       | -1.73                           | -                           | -          | -                               | -                           |
|                  | -          | -                               | -                           | top <sub>Pd</sub> *       | -1.38                           | -                           | -          | -                               | -                           |
|                  | -          | -                               | -                           | top <sub>Rh</sub> *       | -1.73                           | -                           | -          | -                               | -                           |
| 0.50             | <b>fcc</b> | <b>-0.70</b>                    | <b>4.23</b>                 | fcc1                      | -1.31                           | -                           | hcp        | -1.91                           | -                           |
|                  | hcp        | -0.45                           | -                           | fcc2                      | -1.31                           | -                           | <b>fcc</b> | <b>-2.01</b>                    | <b>3.46</b>                 |
|                  | mixed      | -0.54                           | -                           | hcp1                      | -1.24                           | -                           | mixed      | -1.80                           | -                           |
|                  | -          | -                               | -                           | hcp2                      | -1.24                           | -                           | -          | -                               | -                           |
|                  | -          | -                               | -                           | hcp3                      | -1.36                           | -                           | -          | -                               | -                           |
|                  | -          | -                               | -                           | <b>mixed1</b>             | <b>-1.39</b>                    | <b>3.65</b>                 | -          | -                               | -                           |
|                  | -          | -                               | -                           | mixed2                    | -1.03                           | -                           | -          | -                               | -                           |
|                  | -          | -                               | -                           | -                         | -                               | -                           | -          | -                               | -                           |
| 0.75             | <b>fcc</b> | <b>-0.38</b>                    | <b>4.51</b>                 | <b>fcc</b>                | <b>-1.14</b>                    | <b>3.01</b>                 | hcp        | -1.64                           | -                           |
|                  | hcp        | -0.12                           | -                           | hcp                       | -1.01                           | -                           | <b>fcc</b> | <b>-1.76</b>                    | <b>2.20</b>                 |
| 1.00             | <b>fcc</b> | <b>0.00</b>                     | <b>5.65</b>                 | <b>fcc</b>                | <b>-0.79</b>                    | <b>3.26</b>                 | hcp        | -1.44                           | -                           |
|                  | hcp        | 0.31                            | -                           | hcp                       | -0.63                           | -                           | <b>fcc</b> | <b>-1.56</b>                    | <b>1.23</b>                 |



**Table S2.** Coverage-dependent adsorption and formation energies for O\* on Rh<sub>50</sub>Pd<sub>50</sub>(100). Dominant adsorption configurations at each coverage are indicated in bold.

| O* Coverage (ML) | Pd skin      |                                 |                             | Mix skin                |                                 |                             | Rh skin       |                                 |                             |
|------------------|--------------|---------------------------------|-----------------------------|-------------------------|---------------------------------|-----------------------------|---------------|---------------------------------|-----------------------------|
|                  | Site Type    | E <sub>adsorption</sub> (eV/O*) | E <sub>formation</sub> (eV) | Site Type               | E <sub>adsorption</sub> (eV/O*) | E <sub>formation</sub> (eV) | Site Type     | E <sub>adsorption</sub> (eV/O*) | E <sub>formation</sub> (eV) |
| 0.00             | -            | -                               | <b>7.19</b>                 | -                       | -                               | <b>8.52</b>                 | -             | -                               | <b>9.58</b>                 |
| 0.25             | bri          | -0.66                           | -                           | bri                     | -1.41                           | -                           | <b>bri</b>    | <b>-2.03</b>                    | <b>7.55</b>                 |
|                  | <b>hol</b>   | <b>-0.84</b>                    | <b>6.35</b>                 | hol <sub>Pd</sub>       | -1.64                           | -                           | hol           | -1.90                           | -                           |
|                  | top          | 0.32                            | -                           | <b>hol<sub>Rh</sub></b> | <b>-1.71</b>                    | <b>6.80</b>                 | top           | -0.88                           | -                           |
|                  | -            | -                               | -                           | top <sub>Rh</sub>       | -1.06                           | -                           | -             | -                               | -                           |
|                  | -            | -                               | -                           | top <sub>Pd</sub>       | 0.42                            | -                           | -             | -                               | -                           |
| 0.50             | hol          | -0.51                           | -                           | hol <sub>Rh</sub>       | -1.14                           | -                           | <b>bri</b>    | <b>-1.93</b>                    | <b>5.72</b>                 |
|                  | bri          | -0.49                           | -                           | bri                     | -1.31                           | -                           | hol           | -1.81                           | -                           |
|                  | <b>mixed</b> | <b>-0.51</b>                    | <b>6.16</b>                 | <b>mixed1*</b>          | <b>-1.52</b>                    | <b>5.47</b>                 | mixed*        | -1.93                           | -                           |
|                  | -            | -                               | -                           | mixed2*                 | -1.52                           | -                           | -             | -                               | -                           |
| 0.75             | hol          | -0.15                           | -                           | hol2                    | -0.80                           | -                           | bri           | -1.62                           | -                           |
|                  | bri1*        | -0.16                           | -                           | bri1*                   | -0.91                           | -                           | hol           | -1.36                           | -                           |
|                  | bri2         | -0.22                           | -                           | bri2*                   | -0.96                           | -                           | <b>mixed1</b> | <b>-1.62</b>                    | <b>4.72</b>                 |
|                  | <b>bri3*</b> | <b>-0.28</b>                    | <b>6.35</b>                 | <b>bri3*</b>            | <b>-1.05</b>                    | <b>5.38</b>                 | mixed2*       | -1.84                           | -                           |
|                  | top          | 0.69                            | -                           | bri4*                   | -1.25                           | -                           | -             | -                               | -                           |
|                  | mixed        | -0.16                           | -                           | bri5*                   | -0.93                           | -                           | -             | -                               | -                           |
|                  | -            | -                               | -                           | bri6*                   | -1.05                           | -                           | -             | -                               | -                           |
|                  | -            | -                               | -                           | hol1                    | -0.87                           | -                           | -             | -                               | -                           |
|                  | -            | -                               | -                           | top1                    | 0.23                            | -                           | -             | -                               | -                           |
|                  | -            | -                               | -                           | top2                    | -0.29                           | -                           | -             | -                               | -                           |
|                  | -            | -                               | -                           | mixed1                  | -0.94                           | -                           | -             | -                               | -                           |
| -                | -            | -                               | mixed2                      | -1.03                   | -                               | -                           | -             | -                               |                             |
| -                | -            | -                               | mixed3                      | -1.05                   | -                               | -                           | -             | -                               |                             |
| 1.00             | hol          | -0.23                           | -                           | hol2                    | -0.70                           | -                           | <b>bri</b>    | <b>-1.43</b>                    | <b>3.87</b>                 |
|                  | <b>bri1</b>  | <b>-0.02</b>                    | <b>7.09</b>                 | <b>bri1</b>             | <b>-0.75</b>                    | <b>5.51</b>                 | hol           | -1.06                           | -                           |
|                  | bri2*        | -0.22                           | -                           | bri2*                   | -0.56                           | -                           | -             | -                               | -                           |
|                  | bri3*        | -0.22                           | -                           | bri3*                   | -0.83                           | -                           | -             | -                               | -                           |
|                  | top          | 0.85                            | -                           | bri4*                   | -0.91                           | -                           | -             | -                               | -                           |
|                  | -            | -                               | -                           | hol1                    | -0.70                           | -                           | -             | -                               | -                           |
| -                | -            | -                               | top                         | 0.09                    | -                               | -                           | -             | -                               |                             |
| 1.25             | hol*         | -0.12                           | -                           | bri*                    | -0.64                           | -                           | <b>bri</b>    | <b>-1.01</b>                    | <b>5.54</b>                 |

**Table S3.** Coverage-dependent adsorption and formation energies for O\* on Rh<sub>50</sub>Pd<sub>50</sub>(110). Dominant adsorption configurations at each coverage are indicated in bold.

| O* Coverage (ML) | Pd skin       |                                 |                             | Mix skin          |                                 |                             | Rh skin   |                                 |                             |
|------------------|---------------|---------------------------------|-----------------------------|-------------------|---------------------------------|-----------------------------|-----------|---------------------------------|-----------------------------|
|                  | Site Type     | E <sub>adsorption</sub> (eV/O*) | E <sub>formation</sub> (eV) | Site Type         | E <sub>adsorption</sub> (eV/O*) | E <sub>formation</sub> (eV) | Site Type | E <sub>adsorption</sub> (eV/O*) | E <sub>formation</sub> (eV) |
| 0.00             | -             | -                               | <b>11.07</b>                | -                 | -                               | <b>11.58</b>                | -         | -                               | <b>12.43</b>                |
| 0.25             | hol           | -0.89                           | -                           | hol <sub>Rh</sub> | -0.94                           | -                           | hol       | -0.57                           | -                           |
|                  | <b>lb</b>     | <b>-1.26</b>                    | <b>9.81</b>                 | hol <sub>Pd</sub> | -0.44                           | -                           | lb        | -1.33                           | -                           |
|                  | sb            | -0.69                           | -                           | lb                | -0.80                           | -                           | <b>sb</b> | <b>-2.05</b>                    | <b>10.37</b>                |
|                  | top           | 0.17                            | -                           | <b>sb</b>         | <b>-1.46</b>                    | <b>10.12</b>                | top       | -0.93                           | -                           |
|                  | -             | -                               | -                           | top <sub>Pd</sub> | 0.36                            | -                           | -         | -                               | -                           |
| 0.50             | -             | -                               | -                           | top <sub>Rh</sub> | -1.05                           | -                           | -         | -                               | -                           |
|                  | <b>lb</b>     | <b>-1.08</b>                    | <b>8.92</b>                 | sb                | -1.49                           | -                           | <b>sb</b> | <b>-2.08</b>                    | <b>8.26</b>                 |
|                  | sb            | -0.64                           | -                           | lb*               | -1.47                           | -                           | lb        | -1.36                           | -                           |
|                  | hol           | -0.80                           | -                           | hol <sub>Rh</sub> | -0.87                           | -                           | hol       | -0.43                           | -                           |
|                  | mixed1        | -0.91                           | -                           | mixed1*           | -1.22                           | -                           | mixed1*   | -1.37                           | -                           |
| 0.75             | mixed2        | -1.07                           | -                           | <b>mixed2*</b>    | <b>-1.51</b>                    | <b>8.56</b>                 | mixed2*   | -2.08                           | -                           |
|                  | lb            | -0.86                           | -                           | sb                | -1.09                           | -                           | <b>sb</b> | <b>-1.67</b>                    | <b>7.42</b>                 |
|                  | sb            | -0.39                           | -                           | <b>lb*</b>        | <b>-1.53</b>                    | <b>7.00</b>                 | hol       | -0.44                           | -                           |
|                  | mixed1        | -0.56                           | -                           | mixed1*           | -1.14                           | -                           | lb*       | -1.27                           | -                           |
|                  | mixed2*       | -0.81                           | -                           | mixed2            | -0.77                           | -                           | top       | -0.85                           | -                           |
|                  | <b>mixed3</b> | <b>-0.90</b>                    | <b>8.38</b>                 | -                 | -                               | -                           | mixed1*   | -1.45                           | -                           |
|                  | mixed4*       | -0.83                           | -                           | -                 | -                               | -                           | mixed2*   | -1.58                           | -                           |
|                  | -             | -                               | -                           | -                 | -                               | -                           | mixed3*   | -1.46                           | -                           |
|                  | -             | -                               | -                           | -                 | -                               | -                           | mixed4    | -1.64                           | -                           |
|                  | -             | -                               | -                           | -                 | -                               | -                           | mixed5*   | -1.39                           | -                           |
| 1.00             | -             | -                               | -                           | -                 | -                               | -                           | mixed6*   | -0.98                           | -                           |
|                  | <b>lb</b>     | <b>-0.88</b>                    | <b>7.56</b>                 | sb                | -0.90                           | -                           | <b>sb</b> | <b>-1.46</b>                    | <b>6.58</b>                 |
|                  | sb            | -0.26                           | -                           | <b>lb</b>         | <b>-0.90</b>                    | <b>7.97</b>                 | lb        | -0.93                           | -                           |
| 1.25             | hol           | -0.69                           | -                           | hol               | -0.44                           | -                           | hol       | -0.32                           | -                           |
|                  | <b>lb</b>     | <b>-0.87</b>                    | <b>7.58</b>                 | <b>lb</b>         | <b>-1.10</b>                    | <b>7.17</b>                 | <b>sb</b> | <b>-1.70</b>                    | <b>5.64</b>                 |

**Table S4.** Linear regression models and errors for predicting average O\* adsorption energy on Rh<sub>50</sub>Pd<sub>50</sub>(111), (100), and (110) model surfaces. The system with the largest RMSE is indicated in bold.

| System                  | Slope (eV/O*/ML) | Intercept (eV/O*) | RMSE (eV/O*) | MAE (eV/O*) |
|-------------------------|------------------|-------------------|--------------|-------------|
| (111) – Pd skin         | 1.3014           | -1.3248           | 0.03         | 0.03        |
| (111) – Mix skin        | 1.3442           | -2.1298           | 0.04         | 0.03        |
| (111) – Rh skin         | 0.9244           | -2.4708           | 0.01         | 0.01        |
| (100) – Pd skin         | 1.0728           | -1.0845           | 0.02         | 0.02        |
| (100) – Mix skin        | 1.3452           | -2.0990           | 0.06         | 0.05        |
| (100) – Rh skin         | 1.0153           | -2.3645           | 0.07         | 0.07        |
| (110) – Pd skin         | 0.3878           | -1.2878           | 0.06         | 0.05        |
| <b>(110) – Mix skin</b> | <b>0.5331</b>    | <b>-1.7016</b>    | <b>0.17</b>  | <b>0.15</b> |
| (110) – Rh skin         | 0.5339           | -2.1930           | 0.15         | 0.13        |

**Table S5.** Parabolic regression models and errors for predicting surface formation energy of O\* covered Rh<sub>50</sub>P<sub>50</sub>(111), (100), and (110) model surfaces. Parabola fit to:  $E_{formation} = A\theta^2 + B\theta + C$ . The system with the largest RMSE is indicated in bold.

| System                  | A (eV/ML <sup>2</sup> ) | B (eV/ML)      | C (eV)         | RMSE (eV)   | MAE (eV)    |
|-------------------------|-------------------------|----------------|----------------|-------------|-------------|
| (111) – Pd skin         | 5.6333                  | -5.6841        | 5.6647         | 0.05        | 0.04        |
| (111) – Mix skin        | 5.1212                  | -8.2987        | 6.4213         | 0.06        | 0.05        |
| (111) – Rh skin         | 3.4873                  | -9.6920        | 7.4571         | 0.03        | 0.03        |
| (100) – Pd skin         | 4.0292                  | -4.1060        | 7.1688         | 0.03        | 0.02        |
| (100) – Mix skin        | 5.6446                  | -8.6171        | 8.5273         | 0.10        | 0.09        |
| (100) – Rh skin         | 6.4137                  | -11.7010       | 9.8025         | 0.34        | 0.29        |
| (110) – Pd skin         | 1.9127                  | -5.2210        | 11.0547        | 0.11        | 0.08        |
| <b>(110) – Mix skin</b> | <b>3.8478</b>           | <b>-8.2437</b> | <b>11.6811</b> | <b>0.42</b> | <b>0.33</b> |
| (110) – Rh skin         | 3.0517                  | -9.0887        | 12.3816        | 0.19        | 0.16        |

**Table S6.** Linear regression models and errors for predicting vibrational energy of O\* covered Rh<sub>50</sub>P<sub>50</sub>(111), (100), and (110) model surfaces. The system with the largest RMSE is indicated in bold.

| System                  | Slope (eV/ML)  | Intercept (eV) | RMSE (eV)   | MAE (eV)    |
|-------------------------|----------------|----------------|-------------|-------------|
| (111) – Pd skin         | 0.0855         | -1.1867        | 0.02        | 0.02        |
| (111) – Mix skin        | 0.3397         | -1.3501        | 0.06        | 0.05        |
| (111) – Rh skin         | 0.3757         | -1.3496        | 0.03        | 0.03        |
| (100) – Pd skin         | 0.0131         | -1.3192        | 0.02        | 0.02        |
| (100) – Mix skin        | 0.0579         | -1.3724        | 0.03        | 0.03        |
| (100) – Rh skin         | -0.1083        | -1.3234        | 0.06        | 0.05        |
| (110) – Pd skin         | -0.3661        | -1.8317        | 0.08        | 0.06        |
| <b>(110) – Mix skin</b> | <b>-0.3838</b> | <b>-1.7797</b> | <b>0.11</b> | <b>0.10</b> |
| (110) – Rh skin         | -0.4894        | -1.7809        | 0.05        | 0.05        |

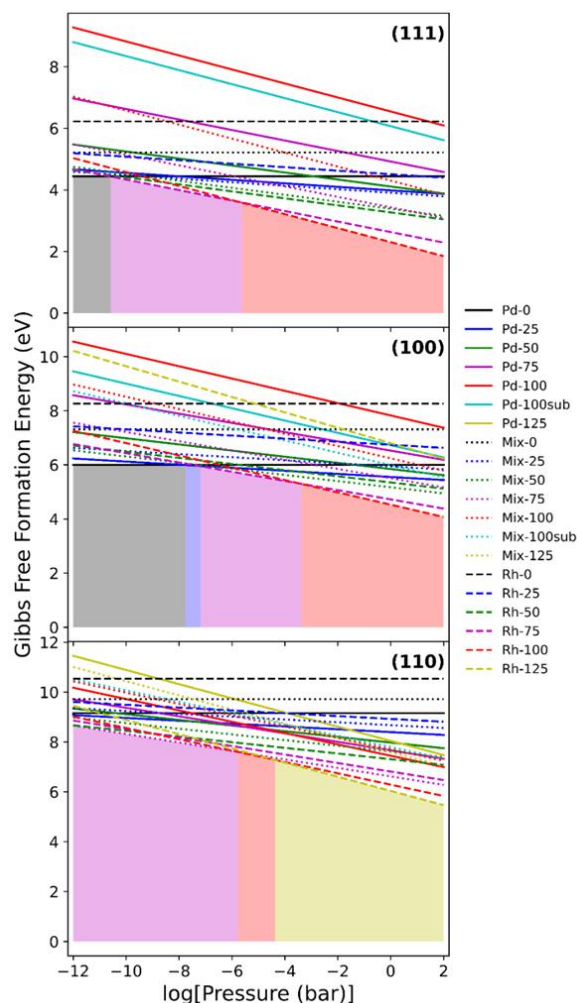

**Figure S14.** 2D phase diagrams of O\* covered Rh<sub>50</sub>Pd<sub>50</sub>(111), Rh<sub>50</sub>Pd<sub>50</sub>(100), and Rh<sub>50</sub>Pd<sub>50</sub>(110) under reaction temperature of 573.15 K while varying O<sub>2</sub> partial pressure (10<sup>-12</sup>-10<sup>2</sup> bar). Bulk Rh and Pd as well as ½ gas phase O<sub>2</sub> are the ΔG = 0 eV references. The solid, dotted, and dashed line denotes Rh-Pd surface structures with Pd, Mix, and Rh skin, respectively. Designated color codes represent different O\* surface coverages (black: 0.00 ML; blue: 0.25 ML; green: 0.50 ML; purple: 0.75 ML; red: 1.00 ML; cyan: 1.00 ML subsurface diffusion; yellow: 1.25 ML). Shade areas indicate corresponding dominant O\* covered/clean Rh-Pd surface structures within specific pressure ranges. Possible metastable states for each facet were identified by determining the surface structures within ±0.5 eV of the dominant phases. For (111), the metastable states are: (low pressure) Mix-25>Rh-50>Rh-75>Pd-25>Mix-50>Rh-100; (high pressure) Rh-50>Rh-100>Mix-50>Mix-25>Pd-0>Pd-25 and Rh-75>Rh-50>Mix-50. For (100), the metastable states are: (low pressure) Mix-50>Rh-75>Rh-50>Mix-25> Rh-100; (high pressure) Rh-100>Mix-50>Pd-25>Rh-50>Pd-0. For (110), the metastable states are: (low pressure) Rh-50>Rh-75>Rh-100>Mix-50>Pd-25>Pd-0; (high pressure) Rh-100>Mix-75>Rh-75.



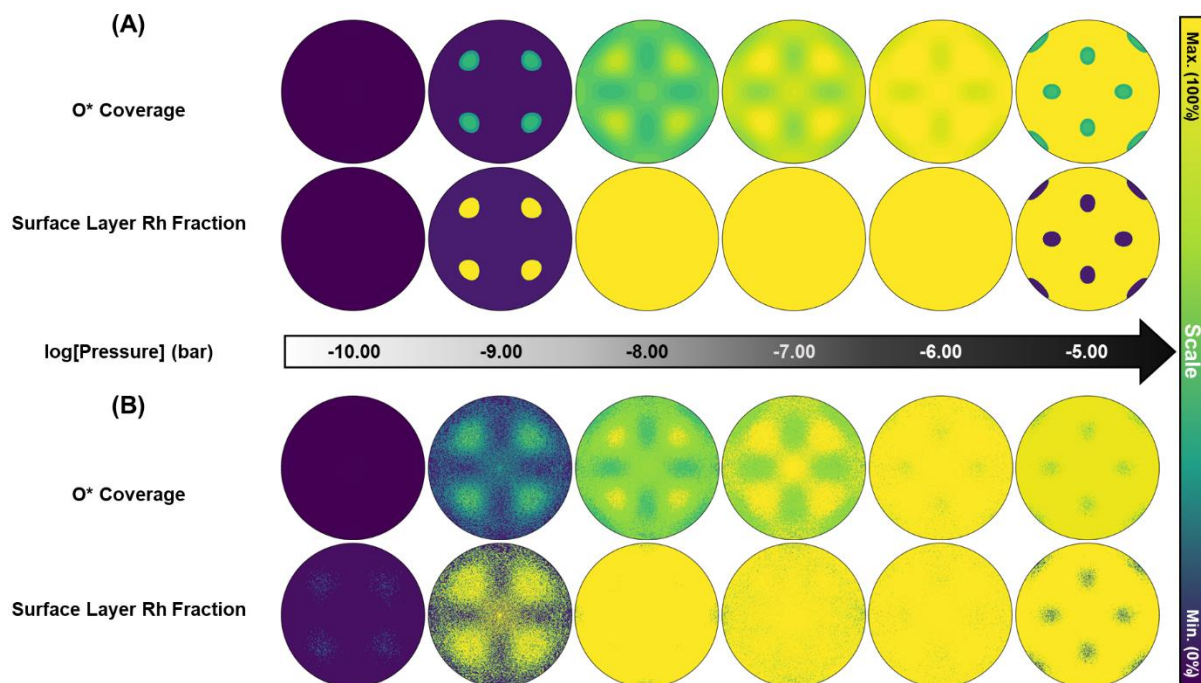

**Figure S15.** Analysis of the impact of DFT-level errors (i.e. from regression models for adsorption, formation, and Gibbs free energy) on equilibrium O\* coverage and surface layer Rh fraction in Rh<sub>50</sub>Pd<sub>50</sub> multi-faceted catalytic nanoparticles. The temperature was set to 573.15 K and O<sub>2</sub> partial pressures ranged from 10<sup>-10</sup>-10<sup>-5</sup> bar. The scale bar represents intensity from a percentage of 0 (purple) to 100 (yellow). (A) No error introduced; (B) Error introduced from the largest RMSEs calculated for adsorption (0.17 eV/O\*), formation (0.42 eV), and vibrational Gibbs free energy (0.11 eV). Data are summarized in Tables S4-S6.

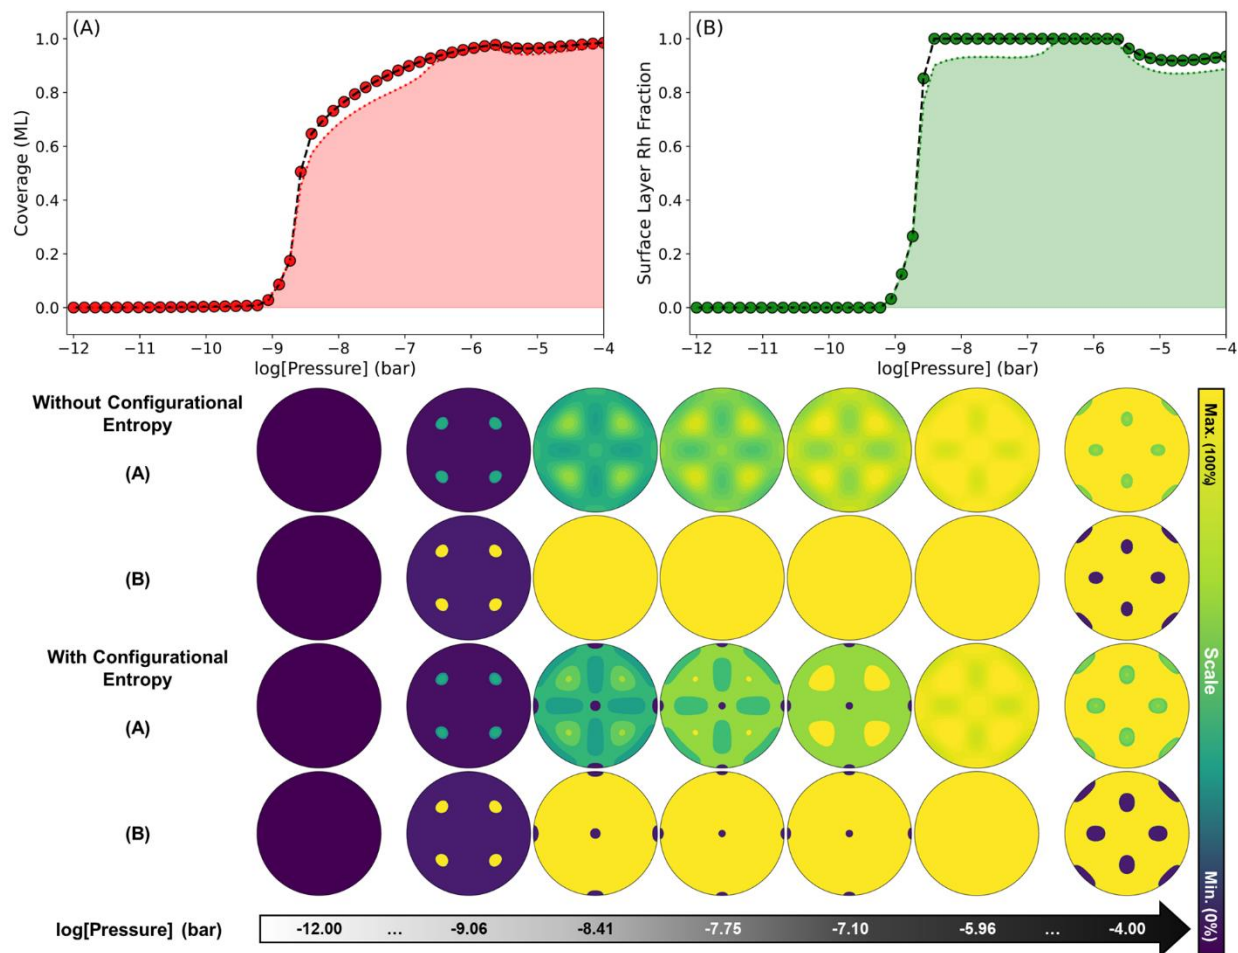

**Figure S16.** Effect of configurational entropy  $\Delta S_{conf} = k_B \ln \left( \frac{1-\theta_{O^*}}{\theta_{O^*}} \right)$  on the equilibrium O\* coverage and surface layer Rh fraction for Rh<sub>50</sub>Pd<sub>50</sub> nanoparticle models. The temperature was set to 573.15 K and O<sub>2</sub> partial pressure ranged from 10<sup>-12</sup>-10<sup>-4</sup> bar. Dashed lines with markers represent nanoparticle model results without configurational entropy. Dotted lines with shaded areas indicate nanoparticle model results with configurational entropy under same conditions. (A) Surface O\* coverage; (B) Surface layer Rh fraction.

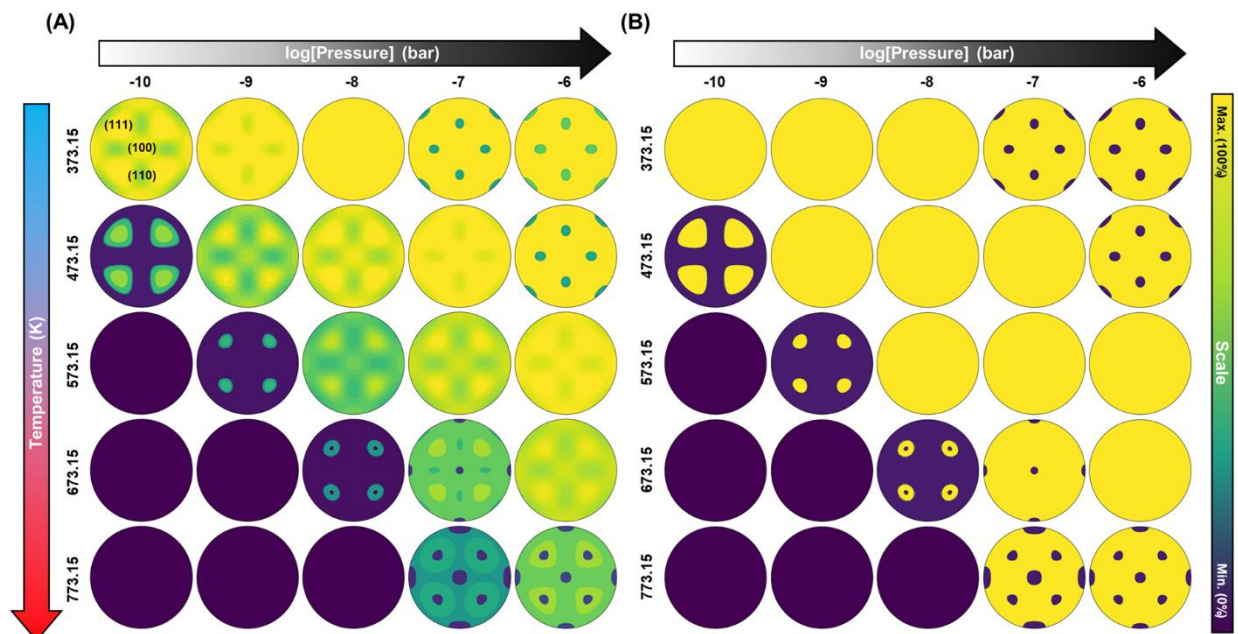

**Figure S17.** Full temperature and pressure dependence on equilibrium O\* coverage and surface layer Rh fraction for Rh<sub>50</sub>Pd<sub>50</sub> nanoparticle models. The temperature was set to 373.15-773.15 K and O<sub>2</sub> partial pressure ranged from 10<sup>-10</sup>-10<sup>-6</sup> bar simultaneously. (A) Surface O\* coverage; (B) Surface layer Rh fraction.

### Extent of Reaction Calculations for Effective O<sub>2</sub> Partial Pressures

To compare our Rh<sub>50</sub>Pd<sub>50</sub> nanoparticle reconstruction models to the relevant experiments, we must determine the equivalent O<sub>2</sub> partial pressures required to reproduce the experimental oxidizing and reducing gas phase environments. Here, we take the oxidizing condition, i.e. 1.33×10<sup>-4</sup> bar NO(g), at 473.15 K as a case study to demonstrate our extent of reaction calculation approach. In this scenario, NO(g) dissociates into N<sub>2</sub>(g) and O\* onto the Rh<sub>50</sub>Pd<sub>50</sub> nanoparticle. As O\* can also be produced from the dissociative adsorption of O<sub>2</sub>(g), the effective O<sub>2</sub>(g) pressure required to obtain an equivalent amount of O\* as 1.33×10<sup>-4</sup> bar of NO(g) under equilibrium conditions can be determined by solving for the extent of reaction for 2NO(g) → N<sub>2</sub>(g) + O<sub>2</sub>(g). For this gas phase reaction, the extent of reaction ( $\varepsilon$ ) can be related to the equilibrium constant by:

$$K_{eq} = \frac{y_{N_2} y_{O_2}}{y_{NO}^2} = \frac{\left(\frac{\varepsilon}{P_{NO,ini}}\right) \left(\frac{\varepsilon}{P_{NO,ini}}\right)}{\left(\frac{P_{NO,ini} - 2\varepsilon}{P_{NO,ini}}\right)^2} = \frac{\varepsilon^2}{(P_{NO,ini} - 2\varepsilon)^2} \quad (S1)$$

The equilibrium constant is related to the Gibbs free energy of reaction by:

$$K_e = \exp\left(-\frac{\Delta G_{rxn}}{k_b T}\right) \quad (S2)$$

Thus, we must calculate the Gibbs free energies for gas phase NO, N<sub>2</sub>, and O<sub>2</sub>, which can be obtained from:

$$\begin{aligned} \Delta G_{rxn} &= \Delta G_{O_2} + \Delta G_{N_2} - 2G_{NO} \\ &= E_{rxn}^{DFT} + \Delta G_{O_2}^{correction}(T, P_{O_2}) + \Delta G_{N_2}^{correction}(T, P_{N_2}) \\ &\quad - 2\Delta G_{NO}^{correction}(T, P_{NO}) \end{aligned} \quad (S3)$$

where  $E_{rxn}^{DFT}$  is the reaction energy calculated at the DFT-level, while  $\Delta G_{O_2}^{correction}(T, P_{O_2})$ ,  $\Delta G_{N_2}^{correction}(T, P_{N_2})$ , and  $\Delta G_{NO}^{correction}(T, P_{NO})$  and the Gibbs free energy corrections from vibrational, rotational, and translational motion for gas phase  $O_2$ ,  $N_2$ , and  $NO$ , respectively.

By examining Equations S1-S3, it is clear that this problem must be solved self-consistently by guessing extents of reaction until the left- and right-hand sides of Equation S1 are equal. This was accomplished using Excel's Solver function. For  $2NO(g) \rightarrow N_2(g) + O_2(g)$  at 473.15 K, the resulting extent of reaction was  $6.67 \times 10^{-5}$  bar, which is consistent with the highly exergonic Gibbs free energy of reaction. Thus, the effective equilibrium  $O_2(g)$  partial pressure is  $6.67 \times 10^{-5}$  bar for an applied  $1.33 \times 10^{-4}$  bar of  $NO(g)$  at 473.15 K. Results for all oxidizing and reducing conditions are shown in Table S7.

**Table S7.** Summary of extent of reaction calculations used to determine the effective  $O_2$  partial pressures under applied oxidizing ( $2NO(g) \rightarrow N_2(g) + O_2(g)$ ) and reducing ( $H_2(g) + \frac{1}{2}O_2(g) \rightarrow H_2O(g)$ ) conditions. Temperature and initial pressures (either  $NO$  or  $H_2$ ) were taken from experiments by Tao et al.<sup>1</sup>

| Conditions                | Temperature (K) | $P_{ini}$ (bar)       | $\Delta G_{rxn}$ (eV) | $\epsilon$ (bar)      | $P_{O_2}^{effective}$ (bar) |
|---------------------------|-----------------|-----------------------|-----------------------|-----------------------|-----------------------------|
| Oxidizing (applied NO)    | 473.15          | $1.33 \times 10^{-4}$ | -1.151                | $6.67 \times 10^{-5}$ | $6.67 \times 10^{-5}$       |
| Reducing (applied $H_2$ ) | 473.15          | $1.33 \times 10^{-4}$ | -1.007                | $1.33 \times 10^{-4}$ | $2.54 \times 10^{-10}$      |
| Oxidizing (applied NO)    | 573.15          | $1.33 \times 10^{-4}$ | -1.131                | $6.67 \times 10^{-5}$ | $6.67 \times 10^{-5}$       |
| Reducing (applied $H_2$ ) | 573.15          | $1.33 \times 10^{-4}$ | -0.954                | $1.33 \times 10^{-4}$ | $3.85 \times 10^{-9}$       |

## References

1. F. Tao, M. E. Grass, Y. Zhang, D. R. Butcher, J. R. Renzas, Z. Liu, J. Y. Chung, B. S. Mun, M. Salmeron and G. A. Somorjai, *Science*, 2008, **322**, 932-934.
